# Supplementary material for: T-cell Response and Antibody Production by Booster COVID-19 Vaccination in Japanese Patients with Chronic Kidney Disease Treated with Hemodialysis
Source: Preprints.org preprint supplement (doi:10.20944/preprints202209.0101.v1), 2022-09-07
Supplement: Supplementary file 4 [file Supplementary Table0904 update.docx]

Supplementary Table1. Characteristics of subjects (Those T-SPOT was measured)

|  | Control group  (n=48) | HD group  (n=64) | *ｐ-value* |
| --- | --- | --- | --- |
| Males (n, (%)) | 32(66.7) | 37(57.8) | 0.43 |
| Age (year-old±SD) | 63.4±8.2 | 69.2±4.8 | 0.0002 |
| BMI (kg/m2±SD) | 24.2±4.8 | 22.5±4.3 | 0.020 |
| Diabetes mellitus (n, (%)) | 9(18.8) | 21(32.8) | 0.13 |
| Hypertension (n, (%)) | 25(52.1) | 22(34.4) | 0.08 |
| Malignant tumor (n, (%)) | 6(12.5) | 13(20.3) | 0.32 |
| Cerebrovascular disease (n, (%)) | 1(2.1) | 11(17.2) | 0.012 |
| Cardiovascular disease (n, (%)) | 1(2.1) | 14(21.9) | 0.002 |
| COPD (n, (%)) | 3(6.3) | 4(6.3) | ＞0.99 |
